# Supplementary material for: A first-principles study on the chemical stability of inorganic perovskite solid solutions Cs1−xRbxPbI3at finite temperature and pressure
Source: Royal Society of Chemistry journal article supplement (doi:10.1039/c8ta06553e), 2018-01-01
Supplement: c8ta06553e1.pdf [file c8ta06553e1.pdf]

# Supporting information – First-principles study on the chemical stability of inorganic perovskite solid solutions $\text{Cs}_{1-x}\text{Rb}_x\text{PbI}_3$ at finite temperature and pressure

Un-Gi Jong<sup>a,b</sup>, Chol-Jun Yu<sup>a\*</sup>, Yun-Hyok Kye<sup>a</sup>, Yun-Sim Kim<sup>a</sup>, Chol-Ho Kim<sup>b</sup>, Son-Guk Ri<sup>c</sup>

<sup>a</sup>Chair of Computational Materials Design, Faculty of Materials Science, Kim Il Sung University,  
Ryongnam-Dong, Taesong District, Pyongyang, Democratic People's Republic of Korea

<sup>b</sup>Natural Science Centre, Kim Il Sung University, Ryongnam-Dong, Taesong District, Pyongyang, Democratic People's Republic of Korea

<sup>c</sup>Chair of Semiconductor Engineering, Faculty of Materials Science, Kim Il Sung University,  
Ryongnam-Dong, Taesong District, Pyongyang, Democratic People's Republic of Korea

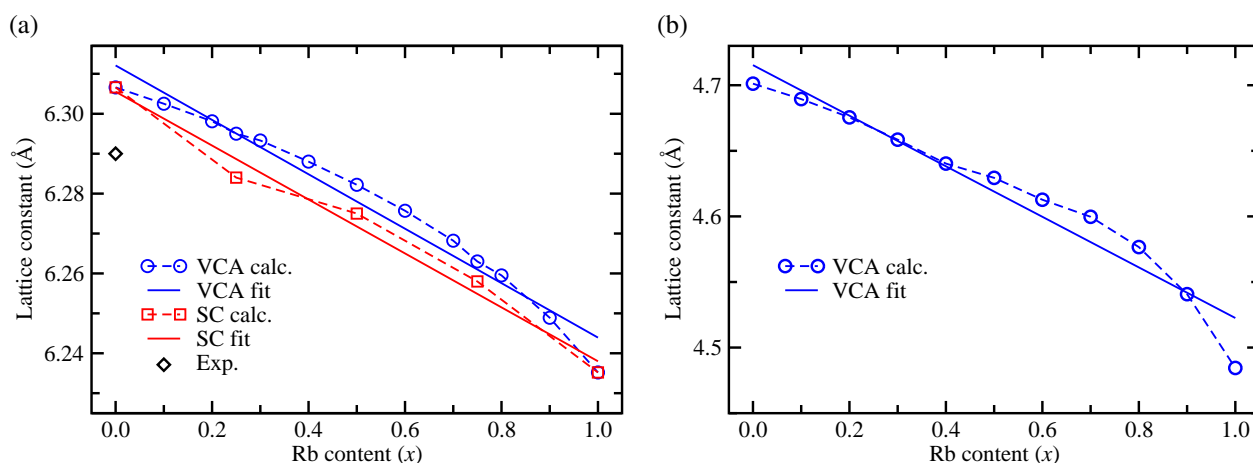

Figure S1. The lattice constants calculated by virtual crystal approximation (VCA) and supercell (SC) methods with their linear fitting lines as a function of Rb content  $x$  for (a)  $\text{Cs}_{1-x}\text{Rb}_x\text{PbI}_3$  and (b)  $\text{Cs}_{1-x}\text{Rb}_x\text{I}$ .

Table S1. Atomic charge of atoms in  $\text{CsPbI}_3$  and  $\text{RbPbI}_3$ , calculated by using the Hirshfeld method.  $C_R$ ,  $C_H$ , and  $C_N$  are reference, Hirshfeld, and net charges, respectively. The sum of atomic charges of iodine atoms is also presented. Positive value indicates the loss of electron, while negative value means the gain of electron.

| Atom         | $C_R$  | $\text{CsPbI}_3$ |        | $\text{RbPbI}_3$ |        |
|--------------|--------|------------------|--------|------------------|--------|
|              |        | $C_H$            | $C_N$  | $C_H$            | $C_N$  |
| Pb           | 14.000 | 13.705           | 0.295  | 13.717           | 0.283  |
| I            | 7.000  | 7.181            | -0.181 | 7.170            | -0.170 |
|              | 7.000  | 7.181            | -0.181 | 7.170            | -0.170 |
|              | 7.000  | 7.181            | -0.181 | 7.170            | -0.170 |
| $\text{I}_3$ |        |                  | -0.543 |                  | -0.510 |
| Cs (Rb)      | 1.000  | 0.752            | 0.248  | 0.772            | 0.228  |

\*Corresponding author: Chol-Jun Yu, Email: cj.yu@ryongnamsan.edu.kp

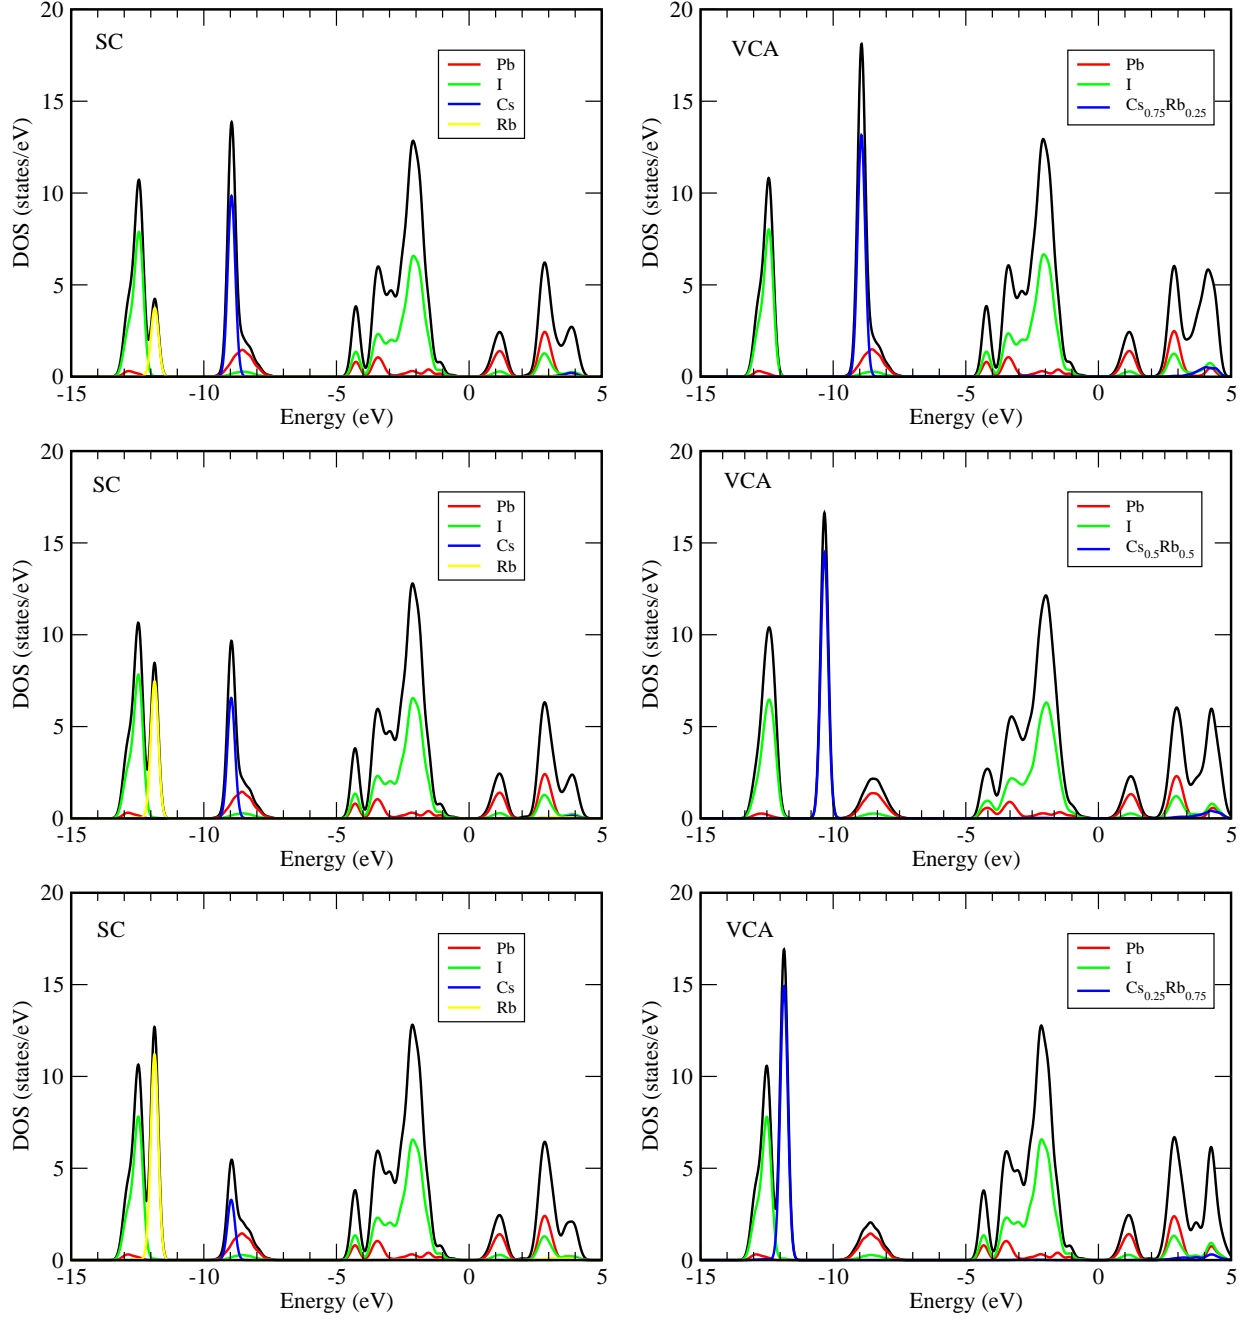

Figure S2. Density of states for  $\text{Cs}_{1-x}\text{Rb}_x\text{PbI}_3$  calculated by SC (left panel) and VCA (right panel) methods. To coincide the scale of DOS, the values of DOS calculated by SC method are multiplied by 0.25 due to the use of  $(2 \times 2 \times 1)$  supercell.

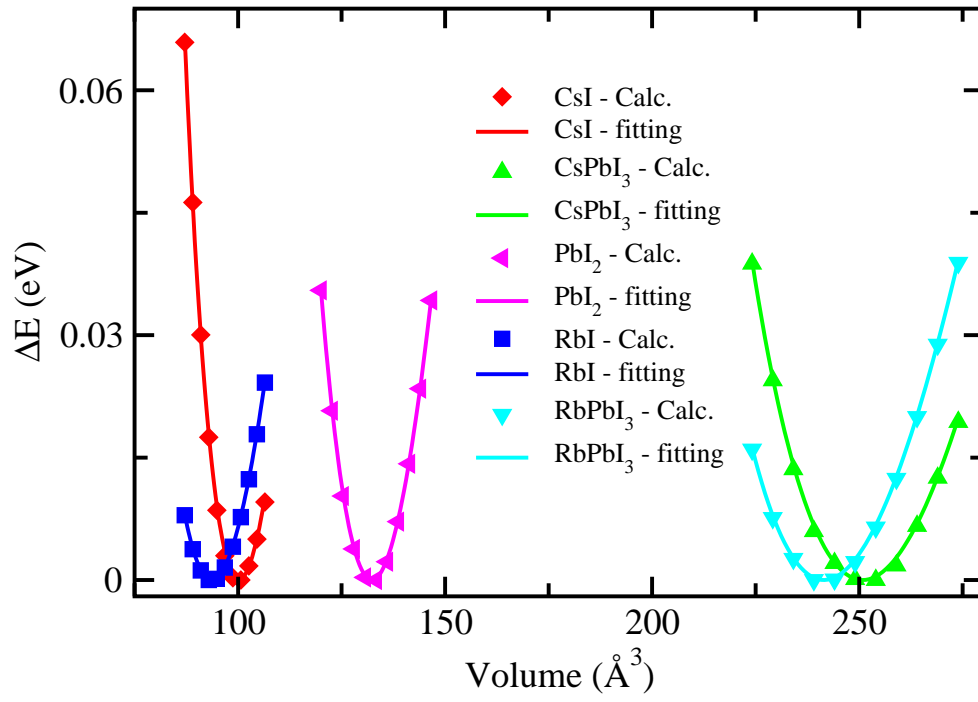

Figure S3.  $E - V$  curves obtained by fitting into the equation of state for Cs(Rb)PbI<sub>3</sub>, PbI<sub>2</sub>, and Cs(Rb)I.

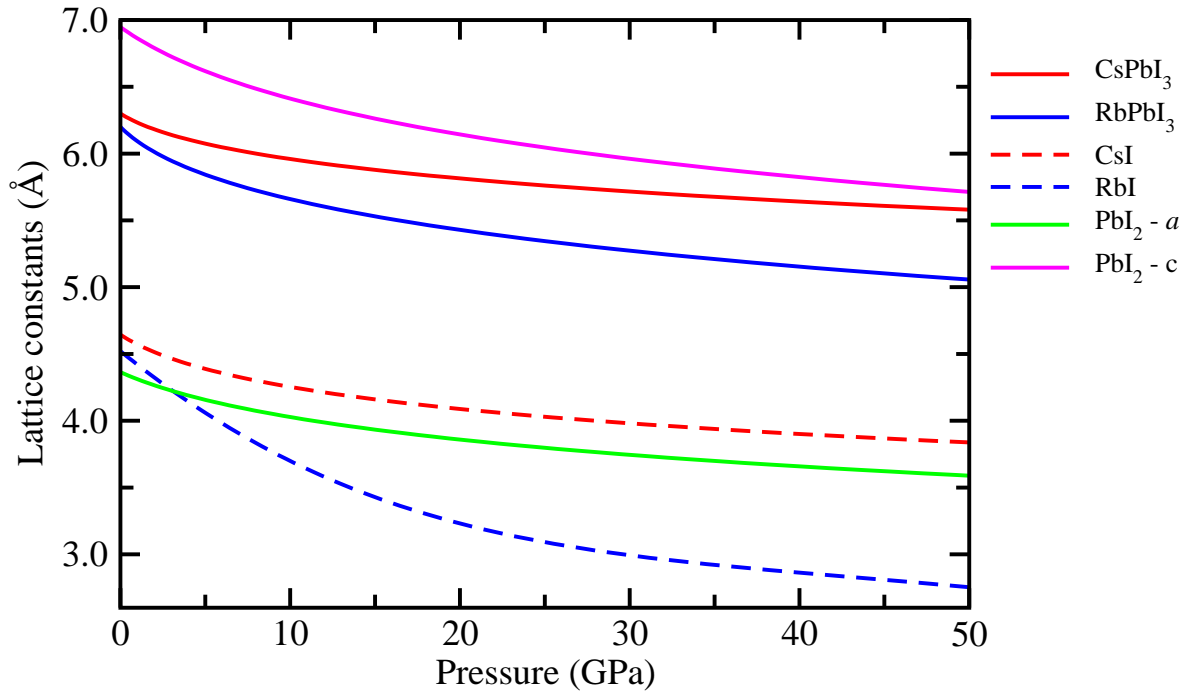

Figure S4. Lattice constant vs. pressure curves for Cs(Rb)PbI<sub>3</sub>, PbI<sub>2</sub>, and Cs(Rb)I.

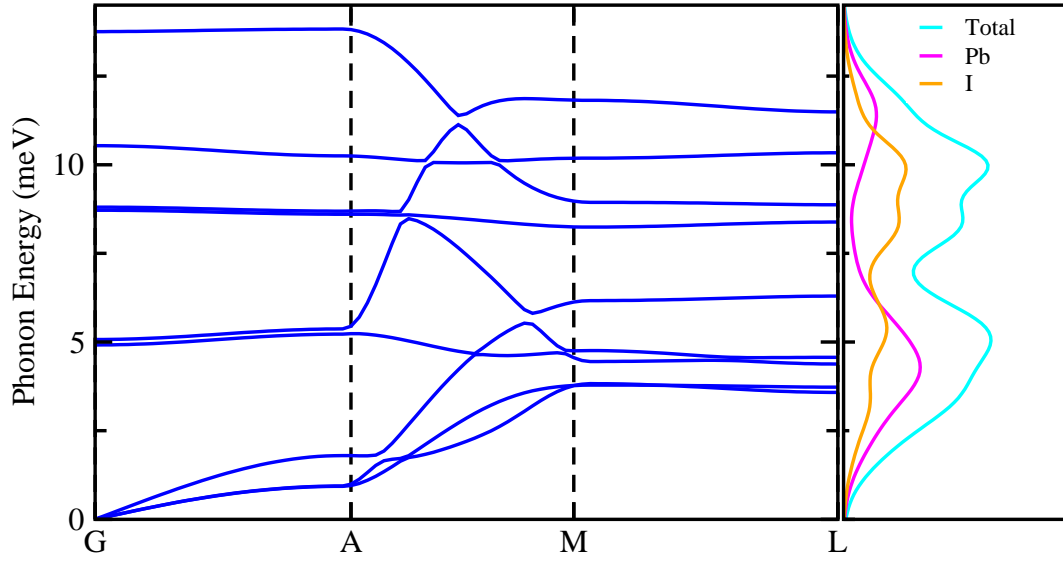

Figure S5. Phonon dispersion curve and DOS of  $\text{PbI}_2$ .

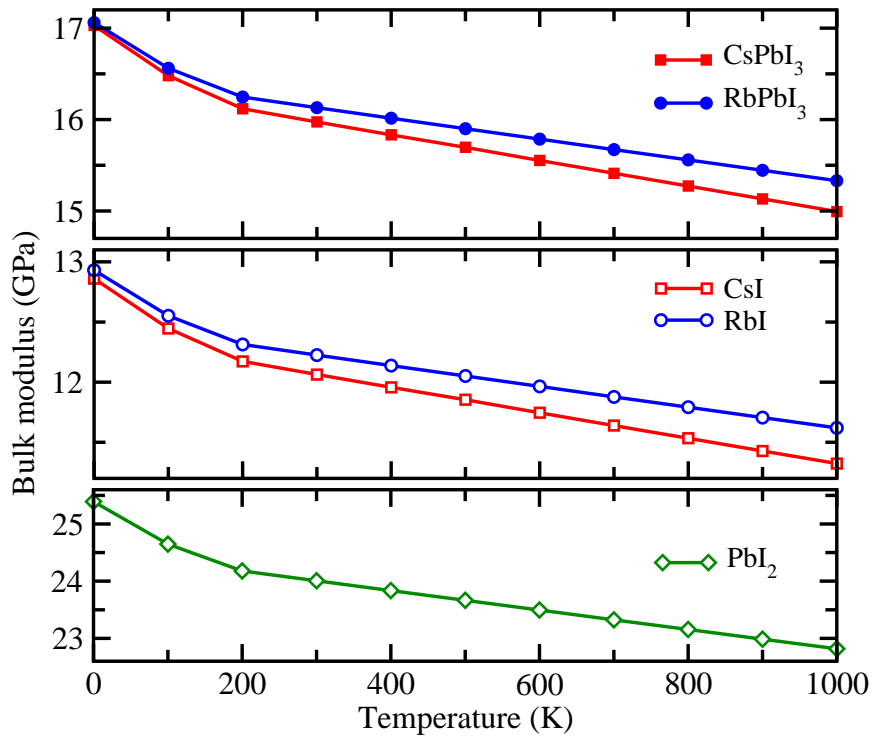

Figure S6. Bulk modulus of  $\text{CsPbI}_3$ ,  $\text{RbPbI}_3$ ,  $\text{CsI}$ ,  $\text{RbI}$  and  $\text{PbI}_2$  as the temperature is rising to 1000 K.
